# Supplementary material for: Roles of Impulsivity, Motivation, and Emotion Regulation in Procrastination – Path Analysis and Comparison Between Students and Non-students
Source: PubMed Central journal article supplement (PMC5996249; doi:10.3389/fpsyg.2018.00891), 2018-06-05
Supplement: Presentation_1.pdf [file Presentation_1.pdf]

Subscales of the questionnaires used in the study and items building the subscales.

### 1. ERQ scales:

**Reappraisal** = erq\_1 + erq\_3 + erq\_5 + erq\_7 + erq\_8 + erq\_10

**Suppression** = erq\_2 + erq\_4 + erq\_6 + erq\_9

### 2. MDT scales:

**Expectancy** = mdt\_1 + mdt\_4 + mdt\_7 + mdt\_10 + mdt\_13 + mdt\_16 + mdt\_19 + mdt\_22

**Value** = mdt\_2 + mdt\_5 + mdt\_8 + mdt\_11 + mdt\_14 + mdt\_17 + mdt\_20 + mdt\_23

**Delay** = mdt\_3 + mdt\_6 + mdt\_9 + mdt\_12 + mdt\_15 + mdt\_18 + mdt\_21 + mdt\_24

### 3. PPS score:

pps\_1 + pps\_2 + pps\_3 + pps\_4 + pps\_5 + pps\_6 + pps\_7 + pps\_8 + pps\_9 + pps\_10 + pps\_11 + pps\_12

### 4. UPPSP scales:

**Reverse-scoring items** (1 -> 4, 2 -> 3, 3 -> 2, 4 -> 1):

upps\_2 upps\_7 upps\_12 upps\_17 upps\_22 upps\_29 upps\_34 upps\_39 upps\_44 upps\_51 upps\_58  
upps\_11 upps\_21 upps\_9 upps\_47 upps\_3 upps\_8 upps\_13 upps\_18 upps\_23 upps\_26 upps\_31  
upps\_36 upps\_41 upps\_46 upps\_52 upps\_56 upps\_5 upps\_10 upps\_15 upps\_20 upps\_25 upps\_30  
upps\_35 upps\_40 upps\_45 upps\_50 upps\_53 upps\_55 upps\_57 upps\_59

**Negative urgency** (r = reversed item): upps\_2r + upps\_7r + upps\_12r + upps\_17r + upps\_22r +  
upps\_29r + upps\_34r + upps\_39r + upps\_44r + upps\_51r + upps\_54 + upps\_58r

**Premeditation** (r = reversed item): upps\_1 + upps\_6 + upps\_11r + upps\_16 + upps\_21r + upps\_28 +  
upps\_33 + upps\_38 + upps\_43 + upps\_48 + upps\_49

**Perseverance** (r = reversed item): upps\_4 + upps\_9r + upps\_14 + upps\_19 + upps\_24 + upps\_27 +  
upps\_32 + upps\_37 + upps\_42 + upps\_47r

**Sensation seeking** (r = reversed item): upps\_3r + upps\_8r + upps\_13r + upps\_18r + upps\_23r +  
upps\_26r + upps\_31r + upps\_36r + upps\_41r + upps\_46r + upps\_52r + upps\_56r

**Positive Urgency** (r = reversed item): upps\_5r + upps\_10r + upps\_15r + upps\_20r + upps\_25r +  
upps\_30r + upps\_35r + upps\_40r + upps\_45r + upps\_50r + upps\_53r + upps\_55r + upps\_57r +  
upps\_59r
