# Supplementary material for: Roles of Impulsivity, Motivation, and Emotion Regulation in Procrastination – Path Analysis and Comparison Between Students and Non-students
Source: PubMed Central journal article supplement (PMC5996249; doi:10.3389/fpsyg.2018.00891), 2018-06-05
Supplement: Presentation_2.pdf [file Presentation_2.pdf]

MPlus script of the final model obtained in the analysis.

TITLE : Procrastination - final mediation model

DATA:

! here enter the name and the path of the data set  
FILE =

VARIABLE:

! e - ERQ questionnaire items  
! p - PPS questionnaire items  
! u - UPPSP questionnaire items  
! m - MDT questionnaire items

NAMES ARE kod age sex student  
e1-e10 m1-m24 p1-p12 u1-u59;  
USEVARIABLES = e2 e4 e6 e9  
m2 m3 m5 m6 m8 m9 m11 m12 m14  
m15 m17 m18 m20 m21 m23 m24  
p1-p12 u1 u2 u4 u6 u7 u9 u11 u12  
u14 u16 u17 u19 u21 u22 u24 u27-u29  
u32-u34 u37-u39 u42-u44 u47-u49 u51  
u54 u58;

ANALYSIS:

TYPE = GENERAL;  
ESTIMATOR = ML;

MODEL:

!SUP - Suppression  
!VAL - Lack of Value  
!DEL - Delay Discounting  
!PPS - Procrastination  
!NU - Negative Urgency  
!PRE - Premeditation  
!PER - Lack of Perseverance  
SUP BY e2 e4 e6 e9;  
VAL BY m2 m5 m8 m11 m14 m17 m20 m23;  
DEL BY m3 m6 m9 m12 m15 m18 m21 m24;  
PPS BY p1-p12;  
NU BY u2 u7 u12 u17 u22 u29 u34 u39 u44 u51 u54 u58;  
PRE BY u1 u6 u11 u16 u21 u28 u33 u38 u43 u48 u49;

PER BY u4 u9 u14 u19 u24 u27 u32 u37 u42 u47;  
m11 WITH m20;  
m17 WITH m23;  
p10 WITH p11;  
p11 WITH p12;  
p1 WITH p2;  
PPS ON PER DEL VAL SUP PRE NU;  
SUP ON PRE NU DEL;

OUTPUT:

tech1;
