# Supplementary material for: Roles of Impulsivity, Motivation, and Emotion Regulation in Procrastination – Path Analysis and Comparison Between Students and Non-students
Source: PubMed Central journal article supplement (PMC5996249; doi:10.3389/fpsyg.2018.00891), 2018-06-05
Supplement: Table_1.pdf [file Table_1.pdf]

Unstandardized coefficients with 95% confidence intervals for all paths in the final SEM model. "E" denotes items of ERQ, "M" refers to MDT, "P" refers to items of PPS and "U" denotes items of UPPSP. See scales description for details.

| Path                     | Unstandardized coefficients with 95% CI |
|--------------------------|-----------------------------------------|
| Suppression BY           |                                         |
| E2                       | 1                                       |
| E4                       | 0.52 (95%CI: 0.44 – 0.6); p<0.001       |
| E6                       | 1 (95%CI: 0.91 – 1.11); p<0.001         |
| E9                       | 0.85 (95%CI: 0.76 – 0.94); p<0.001      |
| Lack of Value BY         |                                         |
| M2                       | 1                                       |
| M5                       | 0.23 (95%CI: 0.13 – 0.35); p<0.001      |
| M8                       | 0.94 (95%CI: 0.79 – 1.12); p<0.001      |
| M11                      | 1.1 (95%CI: 0.92 – 1.29); p<0.001       |
| M14                      | 1.58 (95%CI: 1.38 – 1.83); p<0.001      |
| M17                      | 1.07 (95%CI: 0.94 – 1.23); p<0.001      |
| M20                      | 1.03 (95%CI: 0.84 – 1.23); p<0.001      |
| M23                      | 0.94 (95%CI: 0.82 – 1.09); p<0.001      |
| Delay Discounting BY     |                                         |
| M3                       | 1                                       |
| M6                       | 0.58 (95%CI: 0.49 – 0.69); p<0.001      |
| M9                       | 0.79 (95%CI: 0.71 – 0.88); p<0.001      |
| M12                      | 0.96 (95%CI: 0.87 – 1.06); p<0.001      |
| M15                      | 0.9 (95%CI: 0.82 – 0.99); p<0.001       |
| M18                      | 0.92 (95%CI: 0.83 – 1.01); p<0.001      |
| M21                      | 0.99 (95%CI: 0.91 – 1.08); p<0.001      |
| M24                      | 0.87 (95%CI: 0.78 – 0.95); p<0.001      |
| Procrastination (PPS) BY |                                         |
| P1                       | 1                                       |
| P2                       | 1.09 (95%CI: 1.02 – 1.18); p<0.001      |
| P3                       | 1.09 (95%CI: 1 – 1.18); p<0.001         |
| P4                       | 1.17 (95%CI: 1.06 – 1.29); p<0.001      |
| P5                       | 1.29 (95%CI: 1.17 – 1.42); p<0.001      |
| P6                       | 1.22 (95%CI: 1.11 – 1.35); p<0.001      |
| P7                       | 1.29 (95%CI: 1.17 – 1.41); p<0.001      |
| P8                       | 1.27 (95%CI: 1.16 – 1.39); p<0.001      |
| P9                       | 1.16 (95%CI: 1.05 – 1.27); p<0.001      |
| P10                      | 1.12 (95%CI: 1.02 – 1.24); p<0.001      |
| P11                      | 1.13 (95%CI: 1.03 – 1.23); p<0.001      |
| P12                      | 1.04 (95%CI: 0.94 – 1.15); p<0.001      |
| Negative Urgency BY      |                                         |
| U2                       | 1                                       |
| U7                       | 0.79 (95%CI: 0.66 – 0.93); p<0.001      |
| U12                      | 0.92 (95%CI: 0.8 – 1.05); p<0.001       |

|                          |                                       |
|--------------------------|---------------------------------------|
| U17                      | 1.09 (95%CI: 0.96 – 1.26); p<0.001    |
| U22                      | 0.78 (95%CI: 0.65 – 0.94); p<0.001    |
| U29                      | 1.12 (95%CI: 1 – 1.26); p<0.001       |
| U34                      | 1.22 (95%CI: 1.08 – 1.39); p<0.001    |
| U39                      | 1.01 (95%CI: 0.89 – 1.14); p<0.001    |
| U44                      | 1.25 (95%CI: 1.12 – 1.4); p<0.001     |
| U51                      | 1.06 (95%CI: 0.93 – 1.2); p<0.001     |
| U54                      | -0.93 (95%CI: -1.06 – -0.78); p<0.001 |
| U58                      | 1.12 (95%CI: 1.01 – 1.26); p<0.001    |
| Lack of Premeditation BY |                                       |
| U1                       | 1                                     |
| U6                       | 1.01 (95%CI: 0.92 – 1.11); p<0.001    |
| U11                      | -0.67 (95%CI: -0.82 – -0.51); p<0.001 |
| U16                      | 1.19 (95%CI: 1.05 – 1.33); p<0.001    |
| U21                      | -0.93 (95%CI: -1.07 – -0.81); p<0.001 |
| U28                      | 1.16 (95%CI: 1.04 – 1.28); p<0.001    |
| U33                      | 1.06 (95%CI: 0.96 – 1.19); p<0.001    |
| U38                      | 0.93 (95%CI: 0.86 – 1.06); p<0.001    |
| U43                      | 0.79 (95%CI: 0.68 – 0.91); p<0.001    |
| U48                      | 1.21 (95%CI: 1.08 – 1.35); p<0.001    |
| U49                      | 1.17 (95%CI: 1.04 – 1.31); p<0.001    |
| Lack of Persistence BY   |                                       |
| U4                       | 1                                     |
| U9                       | -0.84 (95%CI: -0.98 – -0.71); p<0.001 |
| U14                      | 0.5 (95%CI: 0.4 – 0.6); p<0.001       |
| U19                      | 0.96 (95%CI: 0.85 – 1.09); p<0.001    |
| U24                      | 0.87 (95%CI: 0.75 – 1.01); p<0.001    |
| U27                      | 1.28 (95%CI: 1.17 – 1.42); p<0.001    |
| U32                      | 1.03 (95%CI: 0.9 – 1.19); p<0.001     |
| U37                      | 1.36 (95%CI: 1.22 – 1.54); p<0.001    |
| U42                      | 1.21(95%CI: 1.09 – 1.28); p<0.001     |
| U47                      | -0.98 (95%CI: -1.13 – -0.84); p<0.001 |
| Procrastination (PPS) ON |                                       |
| Lack of Persistence      | 0.33 (95%CI: 0.19 – 0.49); p<0.001    |
| Delay Discounting        | 0.31 (95%CI: 0.21 – 0.42); p<0.001    |
| Lack of Value            | 0.52 (95%CI: 0.35 – 0.73); p<0.001    |
| Suppression              | 0.03 (95%CI: 0 – 0.06); p<0.1         |
| Suppression ON           |                                       |
| Lack of Premeditation    | -0.62 (95%CI: -0.9 – -0.35); p<0.001  |
| Negative Urgency         | 0.91 (95%CI: 0.58 – 1.27); p<0.001    |
| Delay Discounting        | 0.55 (95%CI: 0.37 – 0.74); p<0.001    |
| Delay Discounting WITH   |                                       |
| Lack of Value            | 0.35 (95%CI: 0.3 – 0.42); p<0.001     |
| Negative Urgency WITH    |                                       |
| Delay Discounting        | -0.13 (95%CI: -0.16 – -0.1); p<0.001  |
| Lack of Value            | -0.25 (95%CI: -0.3 – -0.21); p<0.001  |

|                            |                                      |
|----------------------------|--------------------------------------|
| Lack of Premeditation WITH |                                      |
| Lack of Value              | 0.06 (95%CI: 0.04 – -0.21); p<0.001  |
| Delay Discounting          | 0.16 (95%CI: 0.13 – 0.2); p<0.001    |
| Negative Urgency           | -0.1 (95%CI: -0.13 – -0.08); p<0.001 |
| Lack of Persistence WITH   |                                      |
| Lack of Value              | 0.2 (95%CI: 0.17 – 0.23); p<0.001    |
| Delay Discounting          | 0.27 (95%CI: 0.23 – 0.32); p<0.001   |
| Negative Urgency           | -0.1 (95%CI: -0.13 – -0.08); p<0.001 |
| Lack of Premeditation      | 0.11 (95%CI: 0.09 – 0.14); p<0.001   |
| M11 WITH                   |                                      |
| M20                        | 0.47 (95%CI: 0.4 – 0.56); p<0.001    |
| M17 WITH                   |                                      |
| M23                        | 0.26 (95%CI: 0.2 – 0.32); p<0.001    |
| P10 WITH                   |                                      |
| P11                        | 0.53 (95%CI: 0.46 – 0.6); p<0.001    |
| P11 WITH                   |                                      |
| P12                        | 0.19 (95%CI: 0.12 – 0.25); p<0.001   |
| P1 WITH                    |                                      |
| P2                         | 0.26 (95%CI: 0.2 – 0.32); p<0.001    |
